1 **Identifying and testing marker-trait associations for growth and phenology in three pine**  
2 **species**

3 Annika Perry<sup>1\*</sup>, Witold Wachowiak<sup>2</sup>, Joan Beaton<sup>3</sup>, Glenn Iason<sup>3</sup>, Joan Cottrell<sup>4</sup>, Stephen  
4 Cavers<sup>1</sup>

5 1. UK Centre for Ecology & Hydrology Edinburgh, Penicuik, Midlothian, EH26 0QB, UK

6 2. Institute of Environmental Biology, Faculty of Biology, Adam Mickiewicz University in  
7 Poznań, Poland

8 3. James Hutton Institute, Craigiebuckler, Aberdeen, AB15 8QH, UK

9 4. Northern Research Station, Forest Research, Roslin, EH25 9SY, UK

10 \* Corresponding author: [annt@ceh.ac.uk](mailto:annt@ceh.ac.uk)

11 **Abstract**

12 Identifying the additive genetic variation underlying complex traits is important for species of  
13 economic and/or ecological value. In particular, where DNA markers can be associated with  
14 trait variation they can be used to develop models to predict phenotypes as the basis of future  
15 selection and conservation programmes. Here, SNPs associated with growth (height and  
16 annual increment) and phenology (budburst and bud set) were identified in three closely  
17 related pine species including *Pinus sylvestris* (Scots pine). A genotyping array was used to  
18 screen 20,795 SNPs from coding regions for their association with trait variation using mixed  
19 linear model (MLM) and multilocus mixed model (MLMM) approaches: 113 SNPs located at  
20 111 loci were significantly associated with the traits, with the majority associated with either  
21 budburst or growth increment in *P. sylvestris*. Common SNPs (MAF > 0.05) identified as  
22 significantly associated with bud set were found in genes putatively involved in only growth

23 and development, whereas SNPs associated with growth and budburst were located in genes  
24 putatively involved in growth and development, response to environment and, to a lesser  
25 extent, reproduction. Predicted values estimated using the model for growth had highly  
26 significant correlations with phenotypes quantified in a *P. sylvestris* common environment  
27 experiment established at two sites in Scotland (YA and GS), but only at one of the sites (YA,  
28 height at 2020:  $r = 0.376$ ,  $p < 0.001$ ). Predicted values estimated with the model for budburst  
29 were found to be weakly but significantly correlated with duration of budburst at one of the  
30 field sites (GS, duration at 2018:  $r = 0.242$ ,  $p = 0.012$ ) and negatively associated with timing  
31 of budburst at the other (YA, stage six:  $r = -0.216$ ,  $p = 0.033$ ). Genomic prediction using the  
32 model for growth was more successful than random selection as a method of selecting tall  
33 trees at both sites. This study provides tentative support for the development of prediction  
34 models for traits that are of interest to both foresters and conservationists, while highlighting  
35 the need for caution when applying them to trees growing in different environments.

## 36 **Keywords**

37 Marker-trait association; predictive model; genetic variation; local adaptation, common  
38 garden trial; quantitative traits; SNP array; Scots pine; *Pinus mugo* complex

## 39 **1. Introduction**

40 A primary goal of association genetics studies of trees is to accelerate research, in what are  
41 typically very long-lived organisms, by developing a capability to predict phenotype from  
42 genotype. However, phenotypic traits are mostly complex, i.e. quantitative and controlled by  
43 many genes (Goddard and Hayes, 2009), and may vary in expression and heritability  
44 depending on the environment in which they are assessed (Schlichting, 1986). Therefore, a  
45 combination of a high number of markers applied to a large number of samples and well-

46 assessed phenotypes, ideally from multiple environments, are required to develop robust  
47 predictive models. The popularity and power of genetic association studies continues to grow  
48 thanks to improvements in the scale, quality and cost of high-throughput sequencing and  
49 genotyping. In particular, the accessibility of cost-effective high-throughput genotyping has  
50 benefited those studying nonmodel organisms for which genome assembly is challenging due  
51 to genome size and/or complexity (Prunier et al., 2016, Zimin et al., 2017).

52 Pines are among the most important commercial forest tree species in the world (Kanninen,  
53 2010), and have high ecological value in forests across the northern hemisphere.  
54 Understanding the genetic architecture of key adaptive traits such as growth, form, disease  
55 resistance and phenology is of interest to a range of stakeholders that include the forestry  
56 industry and conservationists. Due to their large size and complexity, pine genomes are  
57 particularly challenging to assemble, and this has only been achieved for loblolly pine (*Pinus*  
58 *taeda*; Zimin et al., 2014) and sugar pine (*Pinus lambertiana*; Stevens et al., 2016), which are  
59 among the largest genomes ever sequenced and assembled. However, thousands of  
60 polymorphic regions potentially suitable for use in high-throughput genotyping for  
61 association studies in pine have been discovered using high-throughput sequencing methods  
62 including whole transcriptome studies (Blanca et al., 2012, Chancerel et al., 2011, Durán et  
63 al., 2019, Geraldès et al., 2011, Liu et al., 2014, Parchman et al., 2010, Trick et al., 2009,  
64 Wachowiak et al., 2015).

65 Using genome-wide DNA markers and their estimated effects to predict breeding values was  
66 first proposed by (Meuwissen et al., 2001) who found that selection based on this method  
67 could significantly increase the rate of genetic gain in subsequent generations. Since then, a  
68 large number of studies have focussed on the development of prediction models and their

69 accuracy in predicting phenotypes, with a focus on wood or fruit quality in tree species  
70 (Kumar et al., 2012, Minamikawa et al., 2017, Muranty et al., 2015, Beaulieu et al., 2014, Isik  
71 et al., 2016, Resende et al., 2012a, Resende et al., 2012b, Thistlethwaite et al., 2017),  
72 although there are also efforts to develop genomic selection methods for disease resistance  
73 traits (Westbrook et al., 2020, Stocks et al., 2019). Association studies and tests of the  
74 strength of genomic prediction using the associated single nucleotide polymorphism (SNP)  
75 markers have been performed in a small number of pine species for a few traits including  
76 serotiny (*Pinus pinaster*, Budde et al., 2014), circumference, height and stem straightness  
77 (*Pinus pinaster*, Bartholomé et al., 2016), oleoresin flow (*Pinus taeda*, Westbrook et al.,  
78 2013) and growth and wood quality traits in *P. sylvestris* (Calleja-Rodriguez et al., 2020).  
79 Genomic prediction aims to increase the efficiency of breeding programmes, shorten the  
80 breeding cycle length, improve timber yield and quality and reduce loss of trees due to pests  
81 and diseases in commercial forestry as well as screen natural populations for their adaptive  
82 potential to future threats such as climate change and disease (Isabel et al., 2020, Capblancq et  
83 al., 2020). However, multiple trials are necessary to identify, test and validate the SNPs  
84 associated with each trait before genomic prediction can be applied with any confidence due  
85 to the potentially confounding effect of phenotypic plasticity. Another overlooked aspect is  
86 the difficulty of applying these approaches to species which do not have well-established  
87 breeding populations, and the comparative ‘messiness’ of natural populations from which  
88 much seed for much planting is derived (Herbert et al., 1999). These natural populations are  
89 likely to lack strong selective pressures of the kind which are imposed on breeding  
90 populations by selection for valuable traits, and the lack of pedigree information makes SNP-  
91 trait association significantly harder.

92 In our study we focused on a set of three closely related species from the *Pinus* genus, *P.*  
93 *sylvestris*, *P. mugo* and *P. uncinata*, that differ strongly in phenotype, geographical  
94 distribution and ecology. These species have previously been studied in several biometric,  
95 quantitative trait and population genetic investigations (Boratyńska and Boratyński, 2007,  
96 Lewandowski et al., 2000, Wachowiak et al., 2013, Wachowiak et al., 2018a, Wachowiak et  
97 al., 2018b) and a SNP array has been developed for them, based on candidate gene and  
98 transcriptome sequencing (Perry et al., 2020). They form a monophyletic group within  
99 Pinaceae (Grotkopp et al., 2004), having diverged within the last 5 million years and adapted  
100 to different environments (Wachowiak et al., 2013, Wachowiak et al., 2011, Wachowiak et  
101 al., 2018a). Despite morphological, geographical and ecological differentiation, the three taxa  
102 show high genetic similarity in biochemical and molecular markers, have the same number of  
103 chromosomes ( $2n = 24$ ), show weak reproductive barriers, and share many ancestral  
104 polymorphisms segregated in the pine genome (Lewandowski et al., 2000; Wachowiak et al.,  
105 2013). Consequently, these taxa form a valuable experimental system in which to undertake  
106 comparative analysis for molecular signatures of selection, ecological divergence and local  
107 adaptation at inter- and intraspecific levels.

108 In this study, using data from common garden experiments and genotypes from a large new  
109 multispecies SNP array, we first identified SNPs associated with growth and phenology in the  
110 three species. Then, to evaluate their potential use as a tool for genomic prediction, we tested  
111 models making use of these SNPs to estimate predicted values for traits in an independent  
112 field trial. Finally, we discuss the potential, and some of the limitations, for making use of  
113 genomic prediction in breeding programmes for *P. sylvestris*.

## 115 2. Methods

116 Experimental design and analyses performed in the study are summarised in Figure 1.

117 Figure 1. Plant material, datasets and analyses used in the study. MU: *P. mugo*; SY: *P.*  
118 *sylvestris*; UN: *P. uncinata*.

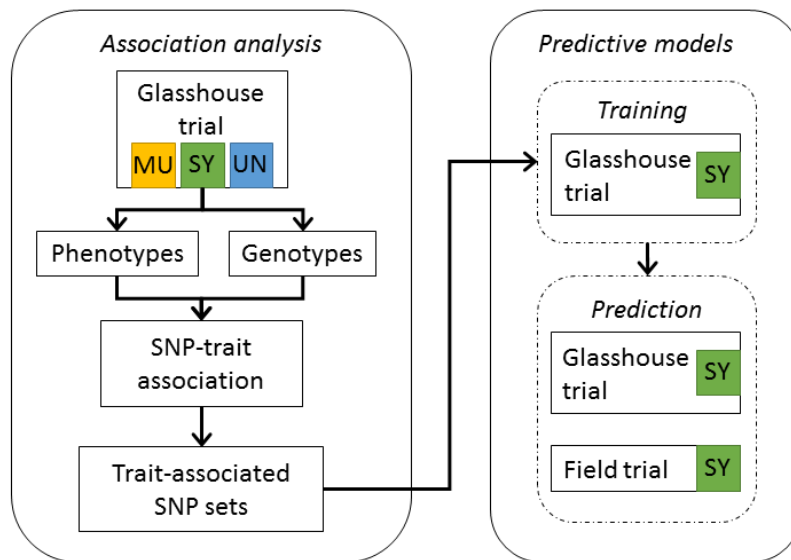

119

### 120 2.1. Plant material and phenotype assessments

121 Collection of plant material, experimental design and phenotype assessments are described by  
122 (Wachowiak et al., 2018a). Briefly, open-pollinated seeds of the three pine species were  
123 collected from three to five families per population from twenty-eight natural populations in  
124 Europe covering the extent of each species' range, including thirteen populations of *P.*  
125 *sylvestris* (SY), nine *P. mugo* (MU), and six *P. uncinata* (UN). Seeds were sown on trays of  
126 compost in spring 2010. After germination, a provenance–progeny trial was established in an  
127 unheated glasshouse at the UK Centre for Ecology and Hydrology, Edinburgh, UK (latitude  
128 55.861261, longitude -3.207819). Seedlings were grown under natural light with automatic  
129 watering applied during the growing season. The trial was divided into 25 randomized blocks

130 with up to five families per population of which the first 18 blocks were analysed by  
131 Wachowiak et al. (2018a).

132 Phenology (traits assessed: BS, timing of bud set, BB, timing of budburst) and growth (traits  
133 assessed: H, total height; I, annual increment - the increase in height from one year to the  
134 next) were recorded for every seedling to evaluate within- and between-species variation  
135 (species means for trees sampled in this study recorded in Table S1). Nested analyses of  
136 variance (ANOVA) were performed in Minitab 17 (Minitab Statistical Software, 2010) with  
137 species, and population nested within species, as fixed effects, families nested within  
138 population as a random effect, and block as a random effect. Response variables were growth  
139 and phenology traits. Analyses were also performed for each species separately. Families with  
140 a single individual were removed from the analyses (four families from MU: family 26 from  
141 population M5; family 9 from population M12; and families 5 and 9 from population M8). To  
142 assess the proportion of variation that is under genetic control, the narrow sense heritability  
143 ( $h^2$ ) for each trait was estimated. Narrow-sense heritability, which is the proportion of total  
144 phenotypic variance ( $V_P$ ) explained by additive genetic effects ( $V_A$ ; Falconer and Mackay,  
145 1996), was estimated using among family, block and residual variance ( $V_{fam}$ ,  $V_{block}$  and  $V_{res}$ ,  
146 respectively) from data pooled across populations:

$$h^2 = \frac{V_A}{V_P} = \frac{RV_{fam}}{V_{fam} + V_{block} + V_{res}}$$

147 where R is the relatedness of individuals within families (individuals within a family are  
148 assumed to be half-siblings as they are from a single mother tree with an unknown paternal  
149 contribution).

150 Bud set was scored when a visible apical bud with clearly developed scales was formed at the  
151 tip of a stem in each seedling and was measured as the number of days since the date on  
152 which the first plant that set a terminal bud was observed (in the first year of growth:  
153 BS2010). Budburst was scored when new needles emerged around the tip of the apical bud in  
154 the main stem and was measured as the number of days since the date on which the first plant  
155 to burst bud was observed (in the second and third years, BB2011, BB2012). Phenology  
156 observations were conducted twice a week. The height of young pines was measured from the  
157 second to fourth year of the pine growth (H2011, H2012, H2013). The annual increment was  
158 estimated for growth between 2011-12 (I2012) and 2012-13 (I2013).

159 An independent multi-site, field-based provenance-progeny trial of *P. sylvestris* was also  
160 phenotyped and used to test results from the glasshouse trial described above. Seeds from  
161 eight families from each of 21 native Scottish *P. sylvestris* populations were collected in  
162 March 2007 and germinated at the James Hutton Institute, Aberdeen (latitude 57.133214,  
163 longitude -2.158764) in June 2007. Germinated seedlings were grown either in a glasshouse  
164 with automatic watering or in pots outside (with additional watering when necessary) until the  
165 trees were moved to one of three transplant sites. A subset of trees from two of these sites  
166 were genotyped as part of this study: a site in the Borders of Scotland (Yair, YA: latitude  
167 55.603625, longitude -2.893025) was planted in October 2012; a site in Aberdeenshire  
168 (Glensaugh, GS: latitude 56.893567, longitude -2.535736) was planted in spring 2012. Trees  
169 transplanted to YA were initially grown in a glasshouse whereas trees transplanted to GS  
170 were started in pots outside. The two transplantation sites also generally experience different  
171 climates, with the YA site typically warmer and drier than the GS site (Table S2) and with a  
172 longer growing season.



173 Trees were planted in four randomised blocks at 3 m x 3 m spacing. A guard row of Scots  
174 pine trees was planted around the periphery of the blocks. Each block comprised one  
175 individual from each of eight families per 21 populations (168 trees). Budburst and height  
176 have been assessed annually since 2015. Height was measured in the winter before the  
177 growing season began from 2015 to 2020. Height was also measured before the start of the  
178 second growing season in March 2008. The annual increment was estimated as the increase in  
179 growth from one year to the next. Each tree was assessed for budburst stage annually from  
180 2015 until 2019 at weekly intervals from early spring until budburst was complete. Seven  
181 distinct stages of budburst were defined (Table S3). The number of days for each tree to reach  
182 each stage of budburst, starting from the day the first tree was observed at each stage, was  
183 recorded. When trees progressed through budburst stages rapidly, skipping a stage between  
184 assessments, a mean value was taken between the two. The duration of the core stages of  
185 budburst (time taken to progress from stage 4 to stage 6) was also estimated. Although the  
186 method used to record budburst was not identical in the glasshouse and multi-site field trials,  
187 the observation of needles as described by (Wachowiak et al., 2018a) is equivalent to stages 5  
188 and 6 in the multi-site field trial. To better understand the relationship between budburst  
189 timing and duration among years and stages, Pearson's correlation coefficient and  
190 significance values between the two were estimated using a package 'Hmisc' (Harrell Jr,  
191 2020) in R (R Core Team, 2020), for each site separately.

## 192 **2.2. Genotyping array**

193 The design of the array, genotyping and SNP calling are as described by (Perry et al., 2020).  
194 Briefly, an array comprising 49,829 single nucleotide polymorphisms (SNPs) was used to  
195 genotype 1,920 DNA samples (from needles of four pine species: the species included here

196 plus *Pinus uliginosa*) according to the Affymetrix Axiom Assay protocol on a GeneTitan and  
197 following genotyping, genotype calls were performed using Axiom Analysis Suite as  
198 recommended by the manufacturer. A subset of trees from the experimental glasshouse trial  
199 described in the previous section were genotyped including twelve populations of *P. sylvestris*  
200 (N = 461) and five populations of *P. mugo* (N = 145) and *P. uncinata* (N = 201). Up to 10  
201 trees were genotyped per family (except for population SY33 which was genotyped up to a  
202 maximum of 14 trees per family). Five families were genotyped per population with the  
203 exception of SY44 (N families = 4), SY30 (N families = 3) and MU5 (N families = 3).  
204 Samples were filtered to remove all those with a call rate < 80 % (N = 45).

205 The multi-site field trial of *P. sylvestris* was also partially genotyped: 100 trees from YA and  
206 108 trees from GS, each comprising the same five populations (Beinn Eighe, BE; Glen Affric,  
207 GA; Glen Loy, GL; Glen Tanar, GT; Rhidorroch, RD) with 19-22 individuals per population  
208 for each site. There were 7-8 families genotyped for each population with 1-3 half-siblings in  
209 each family at each site. These datasets are henceforth referred to as YA-SY and GS-SY.

### 210 **2.3. Population genetic structure, kinship and statistical power**

211 Population genetic structure was assessed visually by constructing a neighbour joining (NJ)  
212 tree in the R package ‘ape’ (Paradis and Schliep, 2019) based on a distance matrix generated  
213 in TASSEL version 5.2.39 (Bradbury et al., 2007) using all samples with call rate > 80 % in  
214 all species (N = 762). SNPs with call rate < 80 % (N = 48) were excluded. Pairwise kinship  
215 (centred identity by state) was estimated for each species independently including only  
216 samples with call rate > 80 % (MU: N = 115; SY: N = 456; UN: N = 191) using all  
217 polymorphic markers in TASSEL. The skewness of the distribution within each species’  
218 matrix was calculated using the D’Agostino skewness test in the R package ‘fBasics’ (Wuertz

219 et al., 2020). The statistical power of each species' dataset (MU; SY; UN), the *P. mugo*  
220 complex (MU-UN), and the full dataset including all species (MU-SY-UN) to detect true  
221 associations between SNPs and adaptive traits was estimated using the method reported by  
222 (Wang and Xu, 2019) under the following assumptions: nominal type 1 error (false positive)  
223 = 0.05; QTL size = 0.05. Statistical power was estimated at different levels of polygenic effect  
224 ( $\lambda$ ): from 0.1 (where polygenic variance is 10 % of phenotypic variance) to 10 (where  
225 polygenic variance is 10 x phenotypic variance). Allele frequencies of all SNPs subsequently  
226 found to be significantly associated with the adaptive traits in the MU-UN dataset were  
227 checked in each species separately (MU and UN) to assess the contribution of each species to  
228 associated genetic variation.

#### 229 **2.4. Genetic associations and putative functions**

230 Identification of SNPs potentially associated with phenology (traits: budburst and bud set) and  
231 growth (traits: height and increment) was conducted for each trait in each year. Association  
232 with SNPs was tested in each species separately (MU; SY; UN) as well as in all species  
233 together (MU-SY-UN) and in the *P. mugo* complex (MU-UN). A mixed linear model (MLM)  
234 with a covariance (kinship: centred identity by state) matrix and a matrix derived from  
235 principal component (PCA) scores, to allow for population stratification, among individuals  
236 was fitted to each locus independently in TASSEL (version 5.2.39). The proportion of true  
237 null hypotheses was estimated using a false discovery rate (FDR) approach, retaining SNPs  
238 associated with traits with adjusted  $p$  values < 0.05.

239 A multi-locus mixed model (MLMM) approach, with 10 steps, was used to identify whether  
240 any loci have large effects (Segura et al., 2012). Highly significant SNPs (based on  
241 estimations of genetic variance,  $p < 0.001$ ) were included in a forward-backward stepwise

242 approach, one by one, as cofactors in the model. The multiple Bonferroni criterion, defined as  
243 the largest model whose cofactors all have a  $p$ -factor below a Bonferroni-corrected threshold  
244 of 0.05, was used to indicate the best model.

245 SNPs were divided into two classes on the basis of their minor allele frequency (MAF): MAF  
246  $> 0.05$ : common; MAF  $< 0.05$ : rare. As it is likely that the majority of traits are controlled by  
247 many genes of very small effect it is important to consider every SNP identified. The narrow  
248 sense heritability of each trait and the proportion of common SNPs identified as associated  
249 with each trait were examined to determine whether traits associated with high frequency  
250 SNPs are also associated with high levels of narrow sense heritability, e.g. due to their  
251 prevalence across the populations in question. Each SNP found to be significant was also  
252 examined to compare the putative function of the genes on which they are located with the  
253 trait in question. To do this, the full unigene sequence for each SNP was BLASTed against  
254 the uniprotkb\_viridiplantae database, the result with the highest score (minimum e-value 1E-  
255 50) for each unigene was retained, and the putative function determined by a literature survey  
256 using the search term '*protein name* function plant'. Where the protein was uncharacterised,  
257 the protein domain and/or family was recorded and the most likely function inferred. Where  
258 putative functions could be determined the genes were grouped according to their role in the  
259 following phenotypic responses: 'Response to environment' (including abiotic and biotic  
260 stress response), 'Growth and development' (including cell division, differentiation and  
261 senescence); 'Reproduction' (including flowering time and seed yield). Although many  
262 cellular processes (e.g. metabolism, signalling pathways, DNA binding, transcription,  
263 translation) were also identified as putative functions, these were assumed to be underlying  
264 control and expression of phenotypic functions and were not assigned a function.

## 265 **2.5 Prediction models: construction and internal testing**

266 Phenotypic prediction multiple linear regression models were constructed in R. A number of  
267 different models were constructed and compared using different sets of SNPs and different  
268 traits to train the model. Predictive models were constructed using SNPs identified as  
269 potentially associated with variation in phenology (trait: budburst: BB2011) and growth  
270 (traits: height and increment: H2013 and I2013). Because the SNPs used in these models were  
271 identified in both the SY and in the MU-SY-UN datasets, separate models were also  
272 constructed comprising just SNPs identified in the SY dataset. Predictive models were also  
273 constructed using the same number of randomly selected SNPs from all polymorphic loci  
274 with similar MAF to the SNPs from each prediction model. Additionally, predictive models  
275 were constructed using all available polymorphic SNPs for SY. All models (phenology and  
276 growth from SY and MU-SY-UN; phenology and growth from SY; random; all polymorphic  
277 SNPs) were run both with and without a MAF filter (retaining only SNPs which were  
278 common ( $MAF > 0.05$ ) in the datasets from which the significant associations were originally  
279 identified). The prediction model for all polymorphic SNPs was constructed using ridge  
280 regression with the R package 'rrBLUP' (Endelman, 2011), rather than multiple linear  
281 regression, as recommended when the number of loci is greater than the number of samples.  
282 For all models, where necessary, family means were used to replace missing data. The  
283 predictive models were run using a training set comprising 60 % of *P. sylvestris* trees from  
284 the glasshouse trial, which had been used to identify associated SNPs, and were internally  
285 tested using the remaining 40 % of *P. sylvestris* glasshouse trees. Models were run using *P.*  
286 *sylvestris* trees and not *P. uncinata* or *P. mugo* as subsequent testing of the models was in this  
287 species alone. We used budburst and growth but not bud set data as subsequent model testing  
288 was applied to data from an independent trial for which only these traits were available.

289 Pearson's correlation coefficient and significance for correlations between predicted values  
290 generated by the predictive models and observed values for both phenology and growth (both  
291 H2013 and I2013 were tested to see which performed best for the growth predictive model)  
292 were estimated using the R package 'Hmisc' (Harrell Jr, 2020).

293 SNPs used in each prediction model were assessed for their variation among *P. sylvestris*  
294 populations using the R package 'hierfstat' (Goudet and Jombart, 2020). Basic statistics  
295 including overall observed heterozygosity ( $H_O$ ), mean gene diversities within populations  
296 ( $H_S$ ), inbreeding coefficient ( $F_{IS}$ ) and population differentiation ( $F_{ST}$ ) were estimated for each  
297 set of SNPs described above.

## 298 **2.6 Independent testing of the models in two outdoor *P. sylvestris* trials**

299 SNPs identified as potentially associated with budburst and growth were tested using  
300 genotype and phenotype data from an independent field trial of *P. sylvestris*, established at  
301 contrasting sites (YA and GS) in 2012. Genotyped trees from the field trials were assigned  
302 predicted values for both phenology and growth) using multiple linear regression models  
303 constructed using either all available SNPs or only those found to be significantly associated  
304 with the trait. The models were those that performed best (i.e. the strongest correlation) in the  
305 internal test and with the full set of *P. sylvestris* trees from the glasshouse trial (call rate > 80  
306 %, N = 456) as a training set. Observed values for growth (height and increment) and  
307 budburst (number of days to reach budburst stages 4 to 6 from the first observation at each  
308 site, and duration for each tree to progress from stage 4 to stage 6) at multiple years (2015-  
309 2020 for increment, 2015-2019 for budburst) were compared with values generated by the  
310 predictive models. Multiple years were used to ensure that annual variation caused by  
311 seasonal differences could also be considered. Because height is a cumulative measure, only

312 the most recent (2020) and the measurements made prior to transplantation (2011) were  
313 compared with the predicted values. To assess the performance of the predictive models, the  
314 Pearson's correlation coefficient and significance values between predicted and observed  
315 values for phenology and growth were estimated for each site (GS and YA) separately using  
316 the R package 'Hmisc' (Harrell Jr, 2020). The use of two sites in independent testing also  
317 allowed comparison of the performance of the predictive models in different environments.

318 The effectiveness of using the predictive model as a genomic selection tool was also tested  
319 and compared with other selection methods. For each method, 10 trees were selected from  
320 each site: for genomic selection the 10 trees at each site with the highest values generated by  
321 the predictive model were chosen; for phenotype selection the 10 tallest trees at each site prior  
322 to the start of the second growing season (measured in March 2008) were chosen; for  
323 comparison, 10 trees were also randomly chosen from each site. The average height at 13  
324 years (2020) of the 10 trees selected using each method was compared. The trees selected  
325 using each method were also compared to the 10 tallest trees at each site at age 13.

### 326 **3. Results**

#### 327 **3.1. Intra- and inter-specific trait variation**

328 Bud set was, on average, earliest for MU and latest for SY with a mean difference of nearly  
329 19 days between the two species (Table S1, Table S4). Bud set for UN occurred, on average,  
330 8.28 days after MU and 10.63 days before SY. Budburst was similarly earliest for MU but  
331 was latest for UN in both years assessed although the mean difference between species was  
332 greater in 2012 (15.17 days) than in 2011 (5.42 days). For all years, on average, MU were the  
333 shortest trees and SY were the tallest with increment similarly greater in SY than in UN or  
334 MU. By 2013, SY trees were on average over double the height of the average MU tree, with

335 UN trees on average just over two-thirds the height of the average SY tree. Narrow sense  
336 heritability estimates for all species were highest for height ( $h^2 = 0.72-1.19$ ) and lowest for  
337 budburst in 2012 ( $h^2 = 0.25$ ) although standard errors for all estimates were very large due to  
338 the small sample sizes (Table S8). Phenotypes for the independent multi-site field trial are  
339 also provided in Table S5.

### 340 **3.2. Summary of genotyping array**

341 High quality genotypes (call rate > 80 %) were obtained for over 94 % of trees genotyped  
342 within the trial (N = 762): MU, N = 115; SY, N = 456; UN, N = 191 (Table S6). There were  
343 over 9,500 high quality (call rate > 80 %) polymorphic SNPs which were shared among the  
344 three species (Table 1), with a further 1,352 SNPs which were polymorphic in at least two  
345 species and monomorphic in a third. The set of successfully converted SNPs (N = 20,795)  
346 reported by (Perry et al., 2020) was found to be identical to those successfully converted in  
347 this study. Genotyped trees from YA and GS were all high quality (Table S7).

348



349 Table 1. Count of polymorphic, monomorphic and low call rate SNPs within and among  
350 species

| SY (456/461)  | UN (191/201)  | MU (115/145)  |              |               |
|---------------|---------------|---------------|--------------|---------------|
|               |               | CR<80 (4,884) | Mono (4,639) | Poly (11,272) |
| CR<80 (9)     | CR<80 (288)   |               |              |               |
|               | Mono (5,297)  |               | 1            |               |
|               | Poly (15,210) | 6             |              | 2             |
| Mono (5,767)  | CR<80         | 47            | 3            | 8             |
|               | Mono          | 208           | 3,446        | 507           |
|               | Poly          | 452           | 251          | 845           |
| Poly (15,019) | CR<80         | 195           |              | 35            |
|               | Mono          | 120           | 723          | 292           |
|               | Poly          | 3,856         | 215          | 9,583         |

351 Species codes: SY, *P. sylvestris*; UN, *P. uncinata*; MU, *P. mugo*. Parentheses after species code indicates  
352 number of samples with call rate > 80 % compared with number of samples genotyped. SNP codes: CR<80, call  
353 rate < 80 %; Mono, monomorphic; Poly, polymorphic. Parentheses after SNP codes for each species indicates  
354 the total number of SNPs within each category for each species individually.  
355

### 356 3.3. Population genetic structure, kinship and statistical power

357 The neighbour joining tree generated from the distance matrix indicated weak population  
358 structure as reported in previous studies (Wachowiak et al., 2013, Wachowiak et al., 2018b).  
359 The pairwise kinship distribution was strongly skewed toward positive kinship values for each  
360 species (D'Agostino's skewness test, MU:  $z = 101.389$ ,  $p < 2.2 \times 10^{-16}$ ; SY:  $z = 446.904$ ,  $p <$   
361  $2.2 \times 10^{-16}$ ; UN:  $z = 153.664$ ,  $p < 2.2 \times 10^{-16}$ ), as expected given the use of half siblings. These  
362 results support the use of mixed model approaches and correction for population stratification  
363 prior to testing for genetic association.

364 The statistical power to detect true associations between SNPs and adaptive traits was found  
365 to be extremely low for both MU and UN even when the polygenic effect was assumed to be  
366 10x the phenotypic variance (Table S9). This is likely to be due to the low sample numbers:  
367 the statistical power of SY was similarly low if the sample numbers were reduced to those of  
368 MU and UN, although the statistical power remained low even when the polygenic effect was  
369 increased. The SY dataset was found to have relatively high statistical power, and the joint

370 MU-UN dataset had lower power, but significantly more than for each species individually.  
371 The statistical power of a dataset including all three pine species was found to be very high  
372 regardless of the polygenic effect. For these reasons, the following datasets were analysed for  
373 associations with traits: the *P. mugo* complex (MU-UN), *P. sylvestris* (SY) and all three pine  
374 species (MU-SY-UN).

### 375 **3.4. Identification of loci associated with traits**

376 One hundred and thirteen SNPs were identified as associated with phenology and growth in  
377 the three pine species (Table 2; Table S10). These included SNPs which were identified in  
378 more than one species' datasets. There was very little overlap of identified SNPs among  
379 different traits or among years within the same trait: four SNPs were associated with more  
380 than one trait, of which only one (comp51128\_c0\_seq1\_1529) was associated with both  
381 phenology (trait: BB2011) and growth (trait: I2013). The vast majority of SNPs were  
382 identified using the MLM approach (N SNPs = 108) rather than the MLMM approach (N  
383 SNPs = 14) and there were many more common SNPs (MAF > 0.05) identified using the  
384 former method (MLM: N = 36; MLMM: N = 1). There were nine SNPs identified as  
385 significantly associated with traits in both MLM and MLMM. Significantly associated SNPs  
386 were identified for all traits in all years except BB2012. The traits with most associated SNPs  
387 were BB2011 (N = 54), I2013 (N = 34) and BS2010 (N = 18), whereas other years/traits all  
388 had low numbers of associated SNPs (H2011, N = 3; H2012, N = 1; I2012, N = 1).

389

390 Table 2. SNPs associated with phenology and growth traits in the three pine species identified  
 391 from a mixed linear model (MLM) in TASSEL and a multi-locus mixed model (MLMM) in R

| Trait            | Species  | MLM    |      | MLMM   |      |
|------------------|----------|--------|------|--------|------|
|                  |          | Common | Rare | Common | Rare |
| <i>Phenology</i> |          |        |      |        |      |
| BB2011           | MU-UN    | 9      | 25   |        | 4    |
|                  | SY       | 7      | 11   |        | 3    |
|                  | MU-SY-UN | 4      | 19   |        | 3    |
| BS2010           | SY       | 4      | 14   |        |      |
| <i>Growth</i>    |          |        |      |        |      |
| H2011            | SY       |        | 1    |        |      |
|                  | MU-SY-UN | 1      | 1    |        |      |
| H2012            | MU-SY-UN | 1      |      |        |      |
| H2013            | SY       | 2      |      |        |      |
|                  | MU-SY-UN | 4      |      | 1      |      |
| I2012            | MU-SY-UN | 1      |      |        |      |
| I2013            | MU-UN    | 6      | 1    |        | 1    |
|                  | SY       | 2      | 20   |        | 4    |
|                  | MU-SY-UN | 6      | 4    | 1      | 1    |

392 Species codes: MU, *P. mugo*; SY, *P. sylvestris*; UN, *P. uncinata*;. Trait codes: budburst (BB); bud set (BS);  
 393 height (H); increment (I). Common: SNPs with MAF > 0.05; Rare: SNPs with MAF < 0.05

394

395 The MAF of SNPs identified for each trait/species' dataset were compared with their narrow  
 396 sense heritability which was grouped into one of four categories: low, N = 8:  $h^2 < 0.4$ ;  
 397 medium, N = 7:  $0.4 \leq h^2 < 0.6$ ; high, N = 7:  $0.6 \leq h^2 < 1$ ; very high, N = 2:  $h^2 > 1$  (Figure 2).  
 398 As the narrow sense heritability increased from low to high, the proportion of SNPs which  
 399 were common similarly increased, although this relationship did not extend to traits with very  
 400 high  $h^2$ .

401

402 Figure 2. Variation in the proportion of common SNPs ( $MAF > 0.05$ ) identified as  
403 significantly associated with each trait for different groupings of narrow sense heritability  
404 ( $h^2$ ): low,  $< 0.4$ ; medium,  $0.4 \leq h^2 < 0.6$ ; high  $0.6 \leq h^2 < 1$ ; very high  $h^2 > 1$ .

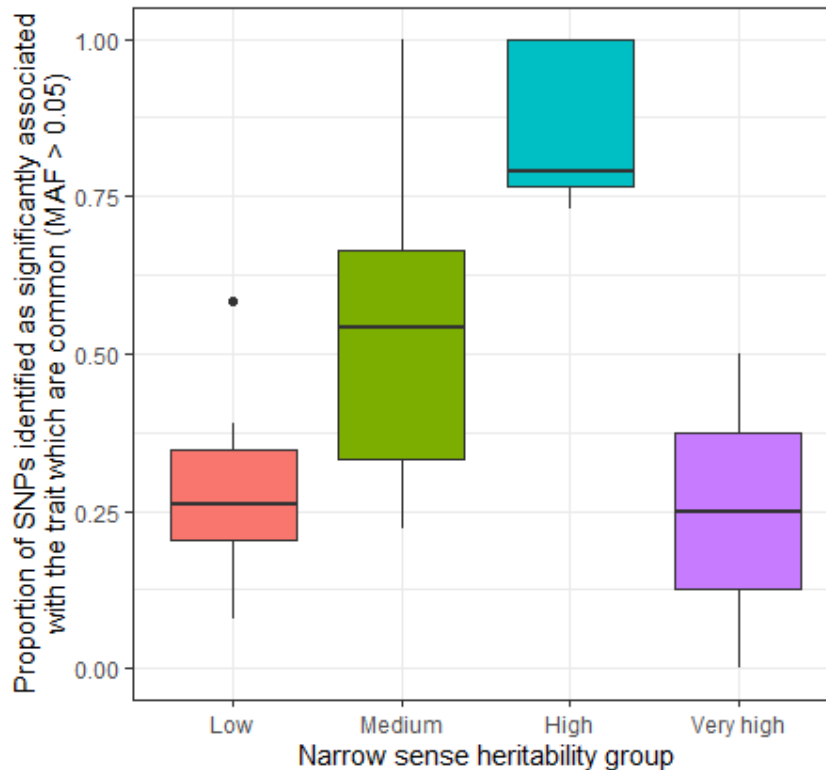

405

406 A higher number of associated SNPs were identified in SY ( $N = 62$ ) than MU-UN ( $N = 43$ ).  
407 Only one SNP (comp51128\_c0\_seq1\_1529) was identified as significant in both datasets  
408 although it was associated with phenology (BB2011 for MU-UN) and growth (I2013 for SY):  
409 it was common ( $MAF > 0.05$ ) in MU-UN but rare ( $MAF < 0.05$ ) in SY (Table S10). A further  
410 45 SNPs were found to be associated with traits when all species were combined within a  
411 single analysis, although 11 of these were also identified in SY and 23 were identified in MU-  
412 UN. No MAF filter was applied prior to screening SNPs for association with the traits of  
413 interest: 37 SNPs were common ( $MAF > 0.05$ ) in at least one dataset. Allele frequencies for  
414 SNPs identified as significantly associated with adaptive traits in MU-UN were compared for  
415 UN and MU separately (Table S11). Diversity was much lower in UN than MU for the

416 majority of SNPs: 23 of the 36 SNPs identified as associated with BB2011 were  
417 monomorphic in UN. In contrast, diversity in UN was much higher for SNPs identified as  
418 significantly associated with I2013 (Table S11). Similarly, the standard error for MU was  
419 more than twice that of UN for BB2011 (MU: 0.73; UN: 0.33) whereas the standard error for  
420 both species was similar for I2013 (MU: 0.47; UN: 0.32) (Table S1).

### 421 **3.5. Putative function of genes containing SNPs associated with traits**

422 One hundred and thirteen SNPs associated with phenology and growth in the three pine  
423 species were located at 111 gene loci (one unigene, comp48223\_c0\_seq1, contained three  
424 SNPs). One locus was originally identified in *Pinus radiata*  
425 (Doth\_comp54682\_c0\_seq1\_159), the remaining were identified following transcriptome  
426 sequencing in *P. sylvestris* and the taxa of the *P. mugo* complex (Perry et al., 2020: Table  
427 S10). The genetic sequences of the loci associated with each trait were found to be highly  
428 similar to proteins with a range of putative functions (Tables S12a-c). The majority of SNPs  
429 associated with bud set (all identified in SY) were found in genes that code for proteins  
430 putatively involved in growth and development (61.11 %) with a few (exclusively rare) SNPs  
431 found in proteins putatively involved in response to environment (22.22 %, Figure 3). In  
432 contrast, budburst had high numbers of associated SNPs (both rare and common) in genes that  
433 code for proteins putatively involved in response to environment and growth and development  
434 (mean % contribution of putative function groups to the total number of proteins containing  
435 SNPs significantly associated with budburst across species' datasets: 39.01 % and 39.09 %  
436 for growth and development and response to environment, respectively). Whereas the  
437 majority of SNPs associated with height were found in proteins putatively associated with  
438 growth and development, SNPs associated with increment were found in proteins putatively

439 associated with both growth and development and response to environment. There are some  
 440 differences among species in the putative function of proteins containing significantly  
 441 associated SNPs: the majority of SNPs in SY are found in proteins putatively associated with  
 442 growth and development for all traits (Figure 3) whereas MU-SY-UN and MU-UN have  
 443 higher proportions of SNPs in proteins putatively associated with response to environment as  
 444 well as growth and development.

445 Figure 3. Contribution of putative function groups (G&D: growth and development; R:  
 446 reproduction; RtE: response to environment) to the total number of proteins containing SNPs  
 447 significantly associated with each trait (bud set, budburst, height and increment) as a  
 448 percentage of the total number of proteins identified for each trait for each species' dataset  
 449 (MU: *P. mugo*; SY: *P. sylvestris*; UN: *P. uncinata*). Proteins which were uncharacterised, for  
 450 which no known function in plants was found or for which only cellular processes could be  
 451 identified are categorised "NA". Total for each trait may be higher than 100 % as there may  
 452 be more than one putative function assigned to a single protein. MAF: minor allele frequency  
 453 (MAF > 0.05: common; MAF < 0.05: rare)

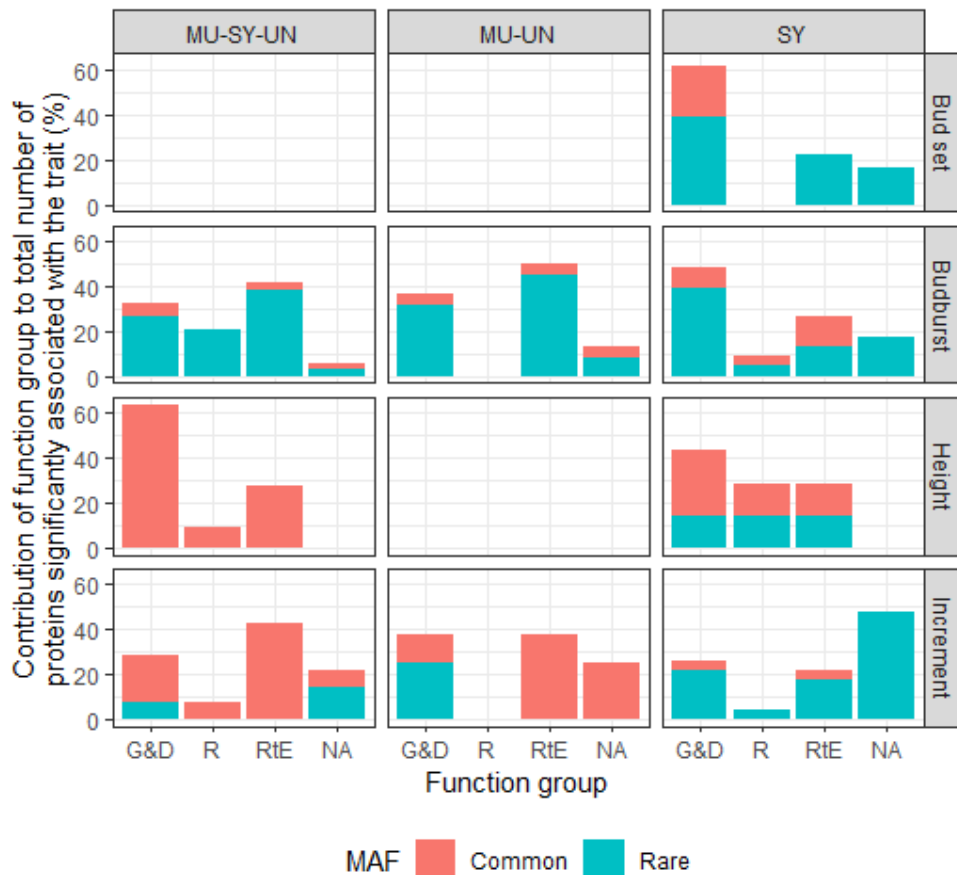

### 455 **3.6. Predictive models for budburst and growth: internal testing in *P. sylvestris***

456 There was a large dropout in the number of SNPs which were suitable to include in  
457 subsequent predictive models: of the 38 SNPs identified as potentially associated with growth  
458 (H2013 and I2013) in the *P. sylvestris* and all species' datasets (SY and MU-SY-UN  
459 respectively), 24 were monomorphic in either (or both) the SY and the independent *P.*  
460 *sylvestris* datasets (YA-SY and GS-SY). Therefore, 14 SNPs were included in the model, of  
461 which seven were rare ( $MAF < 0.05$ ) in the SY dataset (although only three of these were rare  
462 in the MU-SY-UN datasets in which they had been identified as associated with the traits). Of  
463 the 14 SNPs, five were identified in the SY dataset, four were identified in the MU-SY-UN  
464 dataset, three were identified in both the MU-UN and MU-SY-UN datasets and two were  
465 identified in both the SY and MU-SY-UN datasets. For the budburst predictive model, a total  
466 of twelve SNPs were used, of which five were rare in the SY dataset. The remaining 23 SNPs  
467 were monomorphic in at least one of the SY, YA-SY and GS-SY datasets. Of the 12 SNPs  
468 used in the model, one (which was rare) was identified in the MU-SY-UN dataset with the  
469 remaining eleven identified in the SY dataset.

470 The SNPs used to construct growth and budburst predictive models were found to have lower  
471 differentiation among populations ( $F_{ST}$ , Table S13) than the full set of polymorphic SNPs for  
472 SY (0.03 and 0.06, respectively). The inbreeding coefficient ( $F_{IS}$ ) was 0.6 – 0.7 for the  
473 majority of SNP sets (Table S13) with slightly higher values observed in the SNP sets for the  
474 random budburst model with a MAF filter ( $F_{IS} = 0.8$ ) and the growth model using SNPs  
475 identified in the SY dataset ( $F_{IS} = 0.9$ ). Observed heterozygosity and gene diversity ( $H_O$  and  
476  $H_S$ , respectively) were both lower in the sets of SNPs which were filtered to include only  
477 those which were common ( $MAF > 0.05$ ) in the original dataset.

478 The performance of each predictive model (i.e. the strength and significance of the correlation  
479 of predicted values with the observed values for each trait) are summarised in Table 3.  
480 Models constructed using random SNPs were not successful in predicting values that were  
481 correlated with observed values for each trait. In all cases, the models constructed without a  
482 MAF filter ( $MAF > 0.05$ ) always performed better than the equivalent models constructed  
483 using only common SNPs, although there was little difference in performance for those  
484 models constructed using all polymorphic SNPs. The predictive model for budburst  
485 constructed using SNPs identified in the SY dataset alone ( $r = 0.40$ ,  $p < 0.001$ ) performed  
486 better than the equivalent model using SNPs identified in both the SY and MU-SY-UN  
487 datasets ( $r = 0.37$ ,  $p < 0.001$ ) although there was only a single rare ( $MAF < 0.05$ ) SNP which  
488 was present in the latter and not the former. For this reason, this predictive model for budburst  
489 (using SNPs identified in SY and with no MAF filter: final budburst model) was chosen to be  
490 tested independently.

491



492 Table 3. Pearson’s correlation coefficient (r) and associated significance values for  
 493 comparison of predicted and actual values for each trait both with and without a MAF filter  
 494 when using prediction models constructed with SNPs significantly associated with each trait  
 495 (Budburst; Growth), a random set of SNPs or all polymorphic SNPs.

| Training trait                     | SNP set            | MAF: No | MAF: Yes |
|------------------------------------|--------------------|---------|----------|
| <i>Predictive models: Budburst</i> |                    |         |          |
| BB2011                             | Budburst           | 0.37*** | 0.12     |
|                                    | Budburst (SY only) | 0.40*** | 0.12     |
|                                    | Random             | -0.04   | -0.02    |
|                                    | All SNPs           | 0.57*** | 0.57***  |
| <i>Predictive models: Growth</i>   |                    |         |          |
| H2013                              | Growth             | 0.26*** | 0.25**   |
|                                    | Growth (SY only)   | 0.20**  | 0.19*    |
|                                    | Random             | 0.14    | 0.11     |
|                                    | All SNPs           | 0.49*** | 0.48***  |
| I2013                              | Growth             | 0.19*   | 0.14     |
|                                    | Growth (SY only)   | 0.19*   | 0.09     |
|                                    | Random             | 0.02    | -0.01    |
|                                    | All SNPs           | 0.35*** | 0.35***  |

496 MAF: No = no Minor Allele Frequency filter applied; Yes = only common (MAF > 0.05) SNPs  
 497 included. MAF was calculated using the datasets from which the SNPs were originally identified as  
 498 being associated with each trait. Significance values: \*, p 0.01-0.05; \*\*, p 0.001-0.01; \*\*\*, p < 0.001  
 499

500 Using H2013 as a training trait, the predictive model for growth performed more poorly using  
 501 SNPs identified in the SY dataset than using SNPs identified in both the SY and MU-SY-UN  
 502 datasets. However, with I2013 as a training trait in the same model, there was no difference in  
 503 performance when the different SNP sets were used. There were highly significant positive  
 504 correlations between observed and predicted values for H2013 when using the prediction  
 505 models for growth whereas using I2013 as the training trait for the predictive model resulted  
 506 in far lower levels of correlation between predicted and observed values. Therefore, the  
 507 predictive model for growth using SNPs identified in both the SY and MU-SY-UN datasets  
 508 with no MAF filter and using H2013 as a training trait (referred to as the final growth model)  
 509 was chosen to be tested independently.

510 The effect of the trait used to train the model was also seen in comparisons of the  
 511 performance of the models constructed using all polymorphic SNPs: for each trait, predicted

512 values were more closely correlated with the observed values in models using budburst than  
513 in those using growth traits (H2013, I2013).

### 514 **3.7. Testing the prediction models in an independent *P. sylvestris* trial**

515 Prior to testing the final growth and budburst prediction models using data from the *P.*  
516 *sylvestris* field trials, the relationship between duration and timing of budburst was examined  
517 more closely. Timing (time taken to reach stages 4, 5 and 6) showed a significant negative  
518 correlation with duration (time taken to progress from stage 4 to 6) of budburst at each year  
519 assessed for stage 4, but the relationship was positively correlated for stage 6 (Table S14). In  
520 contrast, the time to reach stage 6 showed a significant positive correlation with the duration  
521 of budburst. Time to reach stage 5 was both positively (at GS) and negatively (YA) correlated  
522 with the duration of budburst.

523 Predicted values were estimated using the final predictive models for budburst and growth as  
524 well as models constructed using all available SNPs and compared with values observed in  
525 the field. The field sites had shared populations and families but contrasting climates,  
526 allowing the models to be independently tested on traits measured in different environments.  
527 The predicted values for each trait were not significantly correlated with the observed values  
528 when using models constructed with all available SNPs (Table 4). In contrast, a number of  
529 significant correlations were observed when using models constructed with SNPs associated  
530 with the traits in question. The predicted values for budburst were found to be significantly  
531 positively correlated with the duration of budburst but only in GS in 2015 and 2018 (Table 4)  
532 indicating a possible effect of annual environmental variation on the predictive power of the  
533 model. They were also negatively associated with the time taken to reach stage 6 of budburst,

534 but only in YA in 2017 (although the values were also close to significance,  $p = 0.06$ , in  
535 2018).

536 Table 4. Pearson's correlation coefficient ( $r$ ) and associated significance values for  
537 comparison of predicted and observed values for each trait. Predicted values estimated by  
538 final predictive models for growth and budburst assessed for their performance in an internal  
539 test (Associated SNP models: budburst - SNPs identified only in SY, no MAF filter applied,  
540 N SNPs = 11; growth - SNPs identified in both SY and MU-SY-UN, no MAF filter applied,  
541 N SNPs = 14). Predictive models constructed using all available SNPs (no MAF filter applied,  
542 N SNPs = 15,019). Duration: time taken for each tree to progress from stage 4 to stage 6.  
543 Stage 6: time taken to reach stage 6 of budburst. Description of each budburst stage is given  
544 in Table 1.  
545

| Observed trait                                             | Year | Associated SNPs |           | All SNPs |        |
|------------------------------------------------------------|------|-----------------|-----------|----------|--------|
|                                                            |      | GS              | YA        | GS       | YA     |
| <i>Predictive model: Budburst (training trait: BB2011)</i> |      |                 |           |          |        |
| Duration                                                   | 2015 | 0.207 *         | 0.063     | -0.005   | 0.088  |
|                                                            | 2016 | 0.105           | 0.136     | -0.112   | 0.016  |
|                                                            | 2017 | 0.162           | 0.019     | -0.131   | -0.030 |
|                                                            | 2018 | 0.242 *         | -0.087    | -0.150   | -0.105 |
|                                                            | 2019 | 0.152           | 0.075     | 0.099    | 0.188  |
| Stage 6                                                    | 2015 | 0.150           | 0.007     | -0.167   | 0.167  |
|                                                            | 2016 | 0.094           | -0.019    | -0.101   | 0.004  |
|                                                            | 2017 | 0.120           | -0.216 *  | -0.093   | -0.047 |
|                                                            | 2018 | 0.153           | -0.187    | -0.177   | 0.029  |
|                                                            | 2019 | 0.128           | -0.058    | 0.111    | 0.134  |
| <i>Predictive model: Growth (training trait: H2013)</i>    |      |                 |           |          |        |
| Height                                                     | 2008 | -0.020          | 0.023     | 0.093    | 0.002  |
|                                                            | 2020 | 0.104           | 0.376 *** | 0.034    | 0.144  |
| Increment                                                  | 2015 | 0.022           | NA        | 0.060    | NA     |
|                                                            | 2016 | 0.173           | 0.299 **  | 0.149    | 0.158  |
|                                                            | 2017 | 0.121           | 0.312 **  | -0.012   | 0.175  |
|                                                            | 2018 | 0.012           | 0.329 *** | 0.030    | 0.138  |
|                                                            | 2019 | 0.123           | 0.205 *   | 0.065    | 0.111  |
|                                                            | 2020 | -0.001          | 0.262 **  | -0.058   | 0.110  |

546 Significance values: \*,  $p$  0.01-0.05; \*\*,  $p$  0.001-0.01; \*\*\*,  $p$  < 0.001  
547

548 The predicted values for growth were found to be significantly associated with observed  
549 increment measurements at YA in every year, but not in GS (Figure 4). The correlation  
550 between predicted values and observed height in 2008 (at age one) was not significant at  
551 either YA or GS, despite the strong correlation observed between predicted values and

552 observed height at age 13 at YA indicating that the cumulative effect of the trees growing in  
553 the environment at YA contributed to the strength of the association.

554 Figure 4. Correlations of observed height measured in 2020 at age 13 against predicted values  
555 using the final predictive model for growth at GS (correlation not significant) and YA.

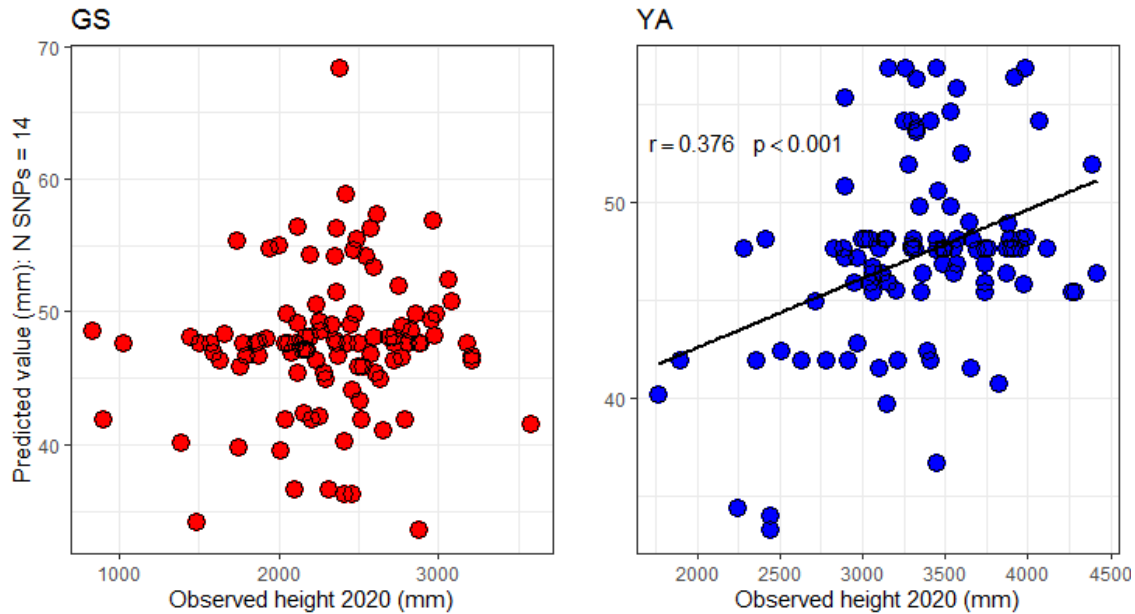

556

557 The effectiveness of the final predictive model for growth as a genomic selection tool was  
558 tested by comparing different selection methods (Figure 5) in trees at both field trial sites (GS  
559 and YA). The selected trees were from all five genotyped populations and included trees from  
560 28 of the 40 families. The majority of families were only represented by a single tree,  
561 although there were exceptions: two individuals were selected from single families in each of  
562 the sites using the phenotype method; two individuals were selected from each of two families  
563 in GS and from each of three families in YA using the genomic method; two individuals were  
564 selected from each of three families in YA using the random method. Genomic selection was  
565 the most successful method of selecting tall trees growing at YA: trees were on average 227  
566 mm and 437 mm taller than trees selected using the phenotype and random methods,  
567 respectively. The differences between selection methods were much smaller at GS: the mean

568 height of the 10 tallest trees selected using each of the selection methods was within a range  
569 of 203 mm. The coefficient of variation (CV) for trees chosen using the phenotype selection  
570 method was over 60 % greater than for those chosen using the genomic selection method at  
571 GS (23.68 and 14.63, respectively), indicating that trees chosen using the phenotype method  
572 were more variable for this trait at the site. Trees selected using the genomic and phenotype  
573 selection methods at YA had very similar CVs (10.84 and 10.31, respectively). Using the  
574 phenotype selection method, there were three trees at GS and none at YA that were among the  
575 ten tallest trees at each site. The genomic selection method identified two trees at YA and one  
576 at GS which were among the ten tallest trees at each site and the random selection method  
577 identified one tree at each of YA and GS which were among the ten tallest trees at each site.

578 Figure 5. Height at 13 years (measured before the growing season started in 2020) of 10 trees  
579 at Yair (YA) and Glensaugh (GS) selected using different methods: Genomic: genomic  
580 selection using values from the final predictive model for growth (SNPs identified in both SY  
581 and MU-SY-UN, no MAF filter applied, N SNPs = 14); Phenotype: phenotype selection  
582 where trees were selected based on their height at one year (before the start of the second  
583 growing season, 2008); Random: trees were randomly selected from each site. Crossbars  
584 indicate means and standard deviations.

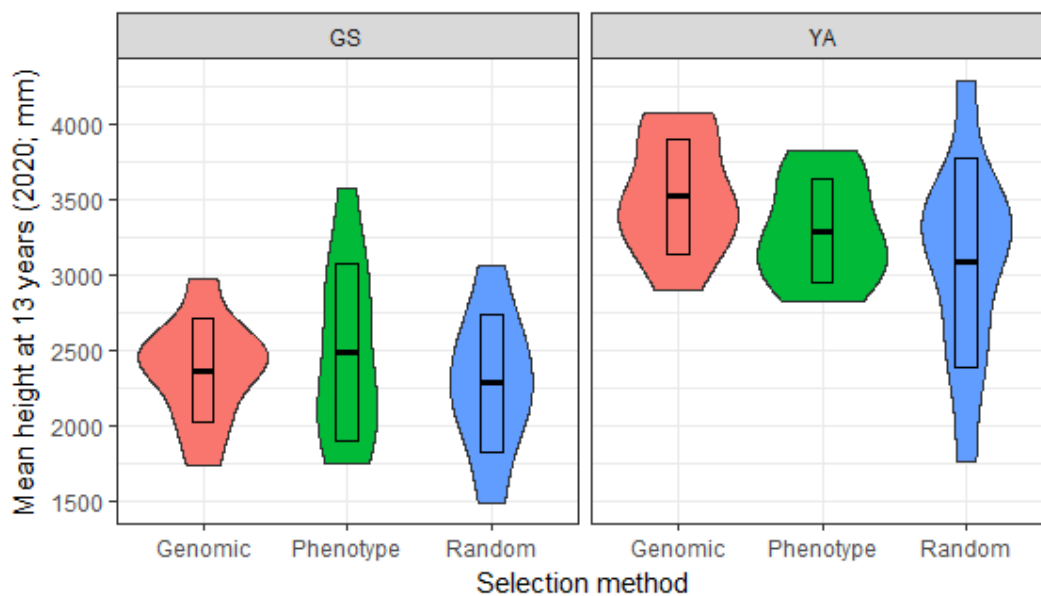

585

586

## 587 **Discussion**

588 This study is among the first to use a high throughput array to identify SNPs associated with  
589 growth and phenology traits in conifers. Although the traits examined here are likely to be  
590 important in an ecological context, *P. sylvestris* is of significant economic value and the  
591 approach has potential for selection of traits of interest to industry. The use of a high-  
592 throughput SNP array allowed nearly 50,000 SNPs to be simultaneously genotyped in a large  
593 number of trees, the vast majority (94 %) of which were of sufficiently high quality to be used  
594 in subsequent analyses. To increase the sample size of the datasets and the statistical power of  
595 our analyses, data from *P. mugo* and *P. uncinata*, which are both part of the *P. mugo*  
596 complex, were combined. The dropout rate for *P. mugo* was much higher, and the call rate  
597 much lower than for *P. sylvestris* and *P. uncinata*. It is likely that this is a consequence of the  
598 dominance of *P. sylvestris* in the sample set used to set allele calling thresholds, coupled with  
599 the genetic distance between the two species (Perry et al., 2020). Despite this, nearly a third of  
600 SNPs on the array were high quality in all three species and nearly half of all successfully  
601 converted SNPs were polymorphic in all three species – twice the number reported by Perry  
602 et al., (2020).

603 Our study applied the genotyped SNP dataset to test for associations with previously  
604 published, well-characterised phenotypes for three pine species (Wachowiak et al., 2018a),  
605 identifying 113 SNPs significantly associated with variation in growth and phenology over  
606 multiple years. The large amount of interspecific variation for each trait, summarised in this  
607 study using the subsampled genotyped trees, supports the use of three species to identify  
608 SNPs as the greater range of phenotypes provides greater scope to identify genetic differences  
609 underlying the variation, as well as the opportunity to compare SNPs identified in each

610 species. As shown in our previous study, the between-population variation in both phenology  
611 and height was far less in *P. mugo* and *P. uncinata* than in *P. sylvestris*, reflecting the fact that  
612 the latter was sampled from a much broader geographical distribution and across much wider  
613 environmental gradients in photoperiod and temperature (Wachowiak et al., 2018a). Despite  
614 the smaller environmental gradient represented by our *P. mugo* sampling, the number of SNPs  
615 identified as significantly associated with phenology was similar to the number identified in  
616 *P. sylvestris*. However, the number of SNPs identified as significantly associated with growth  
617 traits was much lower.

618 Overall, the majority of SNPs identified in this study were rare. Of those that were common,  
619 the numbers of SNPs identified as significantly associated with traits were similar among *P.*  
620 *sylvestris* and the *P. mugo* complex for both phenology (11 and nine for *P. sylvestris* and the  
621 *P. mugo* complex, respectively) and growth (four and six for *P. sylvestris* and the *P. mugo*  
622 complex, respectively). Although one SNP was found to be associated with both phenology  
623 and growth (the former in the *P. mugo* complex and the latter in *P. sylvestris*) it was  
624 extremely rare in *P. sylvestris*. Most likely, this reflects the confounding effect observed when  
625 a small number of individuals (in this case, two) have both a rare allele at this locus and are at  
626 the tail-end of a trait distribution (the two individuals were ranked 366 and 412 out of 413 for  
627 increment in 2013). This finding supports the use of MAF filtering, which is frequently  
628 performed either before or during analysis, although here we report all SNPs to evaluate the  
629 relative contribution of rare and common SNPs to each trait and to assess the predictive  
630 power of models constructed using SNPs with and without MAF filtering. There were very  
631 few instances of the same SNP being associated among traits, among species or among years,  
632 which may indicate the involvement of different genes at different stages of development or  
633 in response to varying environmental conditions, as well as the very small effect sizes of most

634 SNPs in polygenic traits (Korte and Farlow, 2013). Our earlier comparative genetic studies of  
635 a large set of SNPs located in nuclear genes similarly found almost no shared polymorphisms  
636 under selection between different taxa of the *P. mugo* complex (Wachowiak et al., 2018b).  
637 The majority of SNPs associated with height, which showed high levels of narrow sense  
638 heritability among species, were common, whereas the majority of SNPs associated with  
639 budburst (of which there were far more than for height), which showed low levels of narrow  
640 sense heritability among species, were rare. The positive relationship between narrow sense  
641 heritability, excepting those with very high heritability values, and the proportion of SNPs  
642 identified which were common suggest that fewer SNPs of larger effect are associated with  
643 traits with high narrow sense heritability, while a larger number of SNPs with smaller effects  
644 are associated with traits with low narrow sense heritability. Calleja-Rodriguez et al. (2020)  
645 found that predictive ability (estimated as the correlation between the genomic estimated  
646 breeding values and phenotypes) was significantly positively associated with narrow sense  
647 heritability in *P. sylvestris* and there are numerous studies in humans discussing the  
648 contribution of SNPs with different MAF to the heritability of traits (e.g. Park et al., 2011;  
649 Yang et al., 2010). However, these are concerned with the relative contribution of variants  
650 with different MAFs to overall heritability, rather than comparing traits with different  
651 heritability values and comparing the MAF of SNPs associated with each. The lack of a  
652 similar relationship for the two individuals with very high values for narrow sense heritability,  
653 which in fact exceed the maximum value (1) for this measure, could be a result of the use of  
654 kinship and distance matrices to account for population stratification which may also,  
655 inadvertently, prevent the identification of SNPs which have an extremely close relationship  
656 with family structure.



657 The quantitative nature of adaptive traits assumes they are polygenically controlled (Mackay,  
658 2001). The majority of studies on genetic control of adaptive traits in conifers have each  
659 identified multiple QTLs or SNPs associated with variation in timing of bud set, budburst and  
660 growth (Bartholomé et al., 2016, Eckert et al., 2009, Holliday et al., 2010, Hurme et al., 2000,  
661 Jermstad et al., 2001, Jermstad et al., 2003, Plomion et al., 1996, Prunier et al., 2013),  
662 although there have also been a limited number of specific genes implicated in the control of  
663 adaptive traits in conifers. For example (Eckert et al., 2015) tested 475 SNPs and found six  
664 significant associations with height and budburst in sugar pine (*Pinus lambertiana*) and  
665 (Budde et al., 2014) identified 17 SNPs significantly associated with serotiny in maritime pine  
666 (*Pinus pinaster*) using an array with 251 SNPs from candidate genes. A study by (Bai et al.,  
667 2019) used specific-locus amplified fragment sequencing (SLAF-seq) to screen over 450,000  
668 SNPs to identify around 30 SNPs associated with resin-yielding capacity and volume of wood  
669 in Masson's pine (*Pinus massoniana*). A high-throughput array was also used by (Westbrook  
670 et al., 2013) to identify 231 SNPs significantly associated with oleoresin flow in clonally  
671 replicated sites over multiple years, of which the vast majority were specific to individual  
672 sites. Loci related to budburst/set were identified in *Picea abies* and *Pinus sylvestris* (PaFTL2,  
673 (Avia et al., 2014) and PsFTL2, (Gyllenstrand et al., 2007), respectively). Other traits which  
674 have been significantly associated with SNPs in pines include wood properties (González-  
675 Martínez et al., 2007), stem quality (Xiong et al., 2016), and disease resistance (Quesada et  
676 al., 2010), all of which were done in *Pinus taeda*.

677 Phenological variation in *Pinus* spp. observed in common garden studies has been repeatedly  
678 shown to be significantly associated with the environment at the site of origin (Howe et al.,  
679 2003, Hurme et al., 1997, Repo et al., 2000, Salmela et al., 2011, Wachowiak et al., 2018a)  
680 with trees from northern European populations setting bud and flushing earlier than trees from

681 more southerly populations. Whereas environmental cues are expected to play an important  
682 role in initiating phenological processes (Dougherty et al., 1994) including budburst (Laube et  
683 al., 2014), bud set is thought to be endogenous in *Pinus* spp, with photoperiod and  
684 temperature having relatively minor effects (Cooke et al., 2012). In this study, we found a  
685 high proportion of common SNPs in genes putatively involved in environmental responses  
686 (including response to abiotic and biotic stress and environmental cues) for both budburst and  
687 growth, but not for bud set. Common SNPs associated with bud set were exclusively located  
688 in genes related to growth and development. At this stage, assigning unigenes in conifers is  
689 largely presumptive and relies on similarity to domains or families of proteins with a large  
690 and/or speculative range of functions, many of which are, as yet, unexplored or undefined.  
691 However, the divergence of assignment among SNPs associated with budburst and bud set,  
692 and its concurrence with physiological understanding of these functions, suggests the genes  
693 implicated may have a role in key adaptive traits. Furthermore, as it has previously been  
694 demonstrated that intragenic linkage disequilibrium decays rapidly in the investigated species  
695 (Wachowiak et al., 2009, Wachowiak et al., 2013), there is a higher likelihood that SNPs  
696 identified may be directly involved in variation of phenology and growth.

697 Although predictive models constructed using all available polymorphic SNPs were the most  
698 successful at predicting values in the internal validation set they had no predictive ability  
699 when tested in an independent set of trees, possibly reflecting the divergent geographic ranges  
700 and associated environments of tree populations used in both trials. In contrast, predictive  
701 models constructed using SNPs identified as significantly associated with budburst and  
702 growth in the training set were found to be successful at estimating values in both the internal  
703 glasshouse grown validation set and the independent field grown sets of trees although the  
704 predictive ability of the models varied spatially (among the sites) and temporally (among

705 years). The final predictive model comprised SNPs from all species' datasets (SY, MU-UN  
706 and MU-SY-UN) indicating that the approach using all three species to identify SNPs was  
707 justified. The final predictive model for growth generated values that were highly  
708 significantly correlated with actual height and increment over multiple years, although only at  
709 YA. In contrast, the predictive ability of the model for trees at GS was poor. Phenotypic  
710 variation is a product of both heritable genetic variation and environmental variation.  
711 Consequently, the extent to which predictions are accurate will depend on the interplay  
712 between the underlying genetic control of the traits and a host of external cues and stresses.  
713 These will affect the control and dynamics of a large number of processes that will, in turn,  
714 affect the expression of the traits both directly and indirectly. Trees growing at the YA site are  
715 much larger than at GS, indicating that there may be environmental limitations for growth at  
716 GS. Trees which were grown in the glasshouse and were used to identify SNPs associated  
717 with growth are unlikely to have many environmental limitations and this could be why the  
718 predictive model works well only for the YA site.

719 Ideally, a predictive model should be used in populations from very similar environments as  
720 the population used to identify SNPs associated with traits and to construct the predictive  
721 model (Resende et al., 2012b). For instance, a predictive model for serotiny constructed by  
722 (Budde et al., 2014) also had variable success when applied to different populations of *Pinus*  
723 *pinaster*.

724 Similarly, the predicted values for budburst were significantly (albeit only weakly) correlated  
725 with the duration of budburst for two years at GS, but not at YA. The relationship between  
726 bud burst timing and duration was found to vary as budburst progressed: trees which were  
727 observed to reach the first few stages of budburst (where scales were open but needles not yet

728 visible) early in the season did not complete the whole budburst process sooner as might be  
729 expected. Instead, these trees took longer overall to complete budburst and it is clear that this  
730 relationship is not consistent among sites. However, it further demonstrates the influence of  
731 the environment on phenotypic variation and the caution that must be applied when  
732 interpreting or extrapolating results from differing environments.

733 There was a significant correlation between the predicted values for budburst and timing of  
734 budburst but only in one year, and at YA only. This was a negative relationship, such that  
735 trees which were predicted to complete budburst early in the season actually completed  
736 budburst late. Although this initially seems surprising, it does have a plausible biological  
737 explanation. The predictive model was constructed using SNPs which were identified as  
738 significantly associated with the timing of budburst in a set of trees from a common garden  
739 glasshouse experiment, whilst the validation data were collected from trees in a field trial. The  
740 environmental difference between the glasshouse and the field was clearly substantial, with  
741 possibly the most important deviation between the two being that temperatures in the  
742 glasshouse did not drop below freezing throughout the winter. The relationship between the  
743 chilling requirement (the accumulation of time spent below a certain temperature) and the  
744 initiation of budburst is complex: tree species and populations differ in their chilling  
745 requirement as well as in their forcing requirement (the accumulation of time spent above a  
746 certain temperature) after the chilling requirement is met (Körner, 2006). An increase in chill  
747 days (mean temperature < 5 °C) can significantly advance budburst timing in *P. sylvestris*  
748 (Laube et al., 2014). Heritable genetic variation in the timing of budburst is therefore likely to  
749 be strongly influenced by environmental cues including chilling and subsequent forcing. The  
750 contrast between the two environments means that trees requiring a greater number of chill  
751 days before the initiation of budburst will experience a delay in the glasshouse but burst their

752 buds earlier in the field, resulting in a negative relationship of the trait among the two  
753 environments. Moreover, variation in the climate ensures that chilling and forcing conditions  
754 vary among sites as well as annually. Although the mean number of annual chill days is  
755 higher in GS than YA it is has fewer growing degree days which may delay the onset of  
756 budburst in some families or populations. Another factor to consider is the different ages of  
757 the trees used to identify SNPs significantly associated with traits, and the age of the trees in  
758 the independent trial used to validate the predictive models. (Resende et al., 2012b) reported  
759 that models generated using young *Pinus taeda* trees did not perform well at predicting  
760 phenotypes for trees at age 6 years.

761 Predictive models potentially provide a tool with which to determine the phenotype of trees  
762 without having to either grow them for a significant period or regularly assess them in the  
763 field, saving both time and money. They therefore have several potential applications  
764 including selecting for key traits in commercial breeding programmes and assessing native  
765 forests for their response to abiotic and biotic stress. However, results from this study  
766 demonstrate the extent to which values generated by predictive models can vary in the  
767 strength of their correlation with the observed values depending on the environment in which  
768 they are tested. In particular this is likely to affect predictive models which are trained in one  
769 environment and then used to generate values for a different environment, but also for  
770 environments which change over time: something which is likely to increase in severity and  
771 likelihood in the near future given climate change predictions (Franklin et al., 2016).

772 However, the small-scale comparisons between different selection methods demonstrate the  
773 potential for the predictive growth model to be used to select trees which are taller on average  
774 than those selected randomly at the field trial sites and which show similar success as the  
775 phenotype selection method at one of the sites (GS) but without the need to wait and

776 phenotype each tree individually. As we had only small sample sizes and a relatively small  
777 pool of trees from which to select, the approach will require further testing using a larger set  
778 of trees in a further set of experimental trials.

## 779 Conclusions

780 Despite its ecological and economic importance there have been no previous studies exploring  
781 association between SNPs and key adaptive traits in *P. sylvestris*. Our study demonstrates the  
782 potential usefulness of the high throughput array developed by (Perry et al., 2020) for  
783 identifying genes and SNPs with significant associations with phenology and growth traits.  
784 Development of a predictive model that has been validated in an independent trial is a  
785 demonstration of the application of the approach to breeding trials in the future. However, the  
786 study shows a strong influence of site environment on development of the traits. This may  
787 affect the ability of predictive models to generate values for populations departing from the  
788 environmental conditions in which the models were trained.

## 789 Author contributions

790 The research was designed and planned by AP, SC and WW; GI and SC designed the multi-  
791 site field trials and its data collection protocols, data collection were performed by WW, AP,  
792 JB, SC, JC and GI; data analysis and manuscript writing were performed by AP. Manuscript  
793 review and revision and final approval of the manuscript were performed by all authors.

## 794 References

- 795 AVIA, K., KÄRKKÄINEN, K., LAGERCRANTZ, U. & SAVOLAINEN, O. 2014. Association of FLOWERING  
796 LOCUS T/TERMINAL FLOWER 1-like gene FTL 2 expression with growth rhythm in Scots pine  
797 (*Pinus sylvestris*). *New Phytologist*, 204, 159-170.
- 798 BAI, Q., CAI, Y., HE, B., LIU, W., PAN, Q. & ZHANG, Q. 2019. Core set construction and association  
799 analysis of *Pinus massoniana* from Guangdong province in southern China using SLAF-seq.  
800 *Scientific reports*, 9, 1-13.

- 801 BARTHOLOMÉ, J., VAN HEERWAARDEN, J., ISIK, F., BOURY, C., VIDAL, M., PLOMION, C. & BOUFFIER,  
802 L. 2016. Performance of genomic prediction within and across generations in maritime pine.  
803 *BMC genomics*, 17, 1-14.
- 804 BEAULIEU, J., DOERKSEN, T., CLÉMENT, S., MACKAY, J. & BOUSQUET, J. 2014. Accuracy of genomic  
805 selection models in a large population of open-pollinated families in white spruce. *Heredity*,  
806 113, 343-352.
- 807 BLANCA, J., ESTERAS, C., ZIARSOLO, P., PÉREZ, D., COLLADO, C., DE PABLOS, R. R., BALLESTER, A.,  
808 ROIG, C., CAÑIZARES, J. & PICÓ, B. 2012. Transcriptome sequencing for SNP discovery across  
809 *Cucumis melo*. *BMC genomics*, 13, 280.
- 810 BORATYŃSKA, K. & BORATYŃSKI, A. 2007. Taxonomic differences among closely related pines *Pinus*  
811 *sylvestris*, *P. mugo*, *P. uncinata*, *P. rotundata* and *P. uliginosa* as revealed in needle  
812 sclerenchyma cells. *Flora-Morphology, Distribution, Functional Ecology of Plants*, 202, 555-  
813 569.
- 814 BRADBURY, P. J., ZHANG, Z., KROON, D. E., CASSTEVENS, T. M., RAMDOSS, Y. & BUCKLER, E. S. 2007.  
815 TASSEL: software for association mapping of complex traits in diverse samples.  
816 *Bioinformatics*, 23, 2633-2635.
- 817 BUDDE, K. B., HEUERTZ, M., HERNÁNDEZ-SERRANO, A., PAUSAS, J. G., VENDRAMIN, G. G., VERDÚ, M.  
818 & GONZÁLEZ-MARTÍNEZ, S. C. 2014. In situ genetic association for serotiny, a fire-related  
819 trait, in Mediterranean maritime pine (*Pinus pinaster*). *New Phytologist*, 201, 230-241.
- 820 CALLEJA-RODRIGUEZ, A., PAN, J., FUNDA, T., CHEN, Z., BAISON, J., ISIK, F., ABRAHAMSSON, S., WU,  
821 H. 2020. Evaluation of the efficient of genomic versus pedigree predictions for growth and  
822 wood quality traits in Scots pine. *BMC Genomics*. 21, 1-17
- 823 CAPBLANCQ, T., FITZPATRICK, M. C., BAY, R. A., EXPOSITO-ALONSO, M. & KELLER, S. R. 2020.  
824 Genomic prediction of (mal) adaptation across current and future climatic landscapes.  
825 *Annual Review of Ecology, Evolution, and Systematics*, 51.
- 826 CHANCEREL, E., LEPOITTEVIN, C., LE PROVOST, G., LIN, Y.-C., JARAMILLO-CORREA, J. P., ECKERT, A. J.,  
827 WEGRZYN, J. L., ZELENKA, D., BOLAND, A. & FRIGERIO, J.-M. 2011. Development and  
828 implementation of a highly-multiplexed SNP array for genetic mapping in maritime pine and  
829 comparative mapping with loblolly pine. *BMC genomics*, 12, 1-14.
- 830 COOKE, J. E., ERIKSSON, M. E. & JUNTILLA, O. 2012. The dynamic nature of bud dormancy in trees:  
831 environmental control and molecular mechanisms. *Plant, cell & environment*, 35, 1707-1728.
- 832 DOUGHERTY, P. M., WHITEHEAD, D. & VOSE, J. M. 1994. Environmental influences on the phenology  
833 of pine. *Ecological Bulletins*, 64-75.
- 834 DURÁN, R., RODRIGUEZ, V., CARRASCO, A., NEALE, D., BALOCCHI, C. & VALENZUELA, S. 2019. SNP  
835 discovery in radiata pine using a de novo transcriptome assembly. *Trees*, 33, 1505-1511.
- 836 ECKERT, A. J., MALONEY, P. E., VOGLER, D. R., JENSEN, C. E., MIX, A. D. & NEALE, D. B. 2015. Local  
837 adaptation at fine spatial scales: an example from sugar pine (*Pinus lambertiana*, Pinaceae).  
838 *Tree Genetics & Genomes*, 11, 42.
- 839 ECKERT, A. J., WEGRZYN, J. L., PANDE, B., JERMSTAD, K. D., LEE, J. M., LIECHTY, J. D., TEARSE, B. R.,  
840 KRUTOVSKY, K. V. & NEALE, D. B. 2009. Multilocus patterns of nucleotide diversity and  
841 divergence reveal positive selection at candidate genes related to cold hardiness in coastal  
842 Douglas fir (*Pseudotsuga menziesii* var. *menziesii*). *Genetics*, 183, 289-298.
- 843 ENDELMAN, J. B. 2011. Ridge regression and other kernels for genomic selection with R package  
844 rrBLUP. *Plant Genome*, 4, 250-255.
- 845 FALCONER, D. S. & MACKAY, T. F. C. 1996. *Introduction to quantitative genetics*, Essex, UK., Longman.
- 846 FRANKLIN, J., SERRA-DIAZ, J. M., SYPHARD, A. D. & REGAN, H. M. 2016. Global change and terrestrial  
847 plant community dynamics. *Proceedings of the National Academy of Sciences*, 113, 3725-  
848 3734.

- 849 GERALDES, A., PANG, J., THIESSEN, N., CEZARD, T., MOORE, R., ZHAO, Y., TAM, A., WANG, S.,  
850 FRIEDMANN, M. & BIROL, I. 2011. SNP discovery in black cottonwood (*Populus trichocarpa*)  
851 by population transcriptome resequencing. *Molecular Ecology Resources*, 11, 81-92.
- 852 GODDARD, M. E. & HAYES, B. J. 2009. Mapping genes for complex traits in domestic animals and their  
853 use in breeding programmes. *Nature Reviews Genetics*, 10, 381-391.
- 854 GONZÁLEZ-MARTÍNEZ, S. C., WHEELER, N. C., ERSOZ, E., NELSON, C. D. & NEALE, D. B. 2007.  
855 Association genetics in *Pinus taeda* L. I. Wood property traits. *Genetics*, 175, 399-409.
- 856 GOUDET, J. & JOMBART, T. 2020. hierfstat: estimation and tests of hierarchical F-statistics. R package  
857 version 0.5-7 ed.
- 858 GROTKOPP, E., REJMÁNEK, M., SANDERSON, M. J. & ROST, T. L. 2004. Evolution of genome size in  
859 pines (*Pinus*) and its life-history correlates: supertree analyses. *Evolution*, 58, 1705-1729.
- 860 GYLLENSTRAND, N., CLAPHAM, D., KÄLLMAN, T. & LAGERCRANTZ, U. 2007. A Norway spruce  
861 FLOWERING LOCUS T homolog is implicated in control of growth rhythm in conifers. *Plant*  
862 *physiology*, 144, 248-257.
- 863 HARRELL JR, F. E. & WITH CONTRIBUTIONS FROM C. DUPONT AND MANY OTHERS 2020. Hmisc:  
864 Harrell Miscellaneous.
- 865 HERBERT R., SAMUEL, S., PATTERSON, G. 1999. Using local stock for planting native trees and shrubs.  
866 Forestry Commission, Edinburgh. 10pp
- 867 HOLLIDAY, J. A., RITLAND, K. & AITKEN, S. N. 2010. Widespread, ecologically relevant genetic markers  
868 developed from association mapping of climate-related traits in Sitka spruce (*Picea*  
869 *sitchensis*). *New Phytologist*, 188, 501-514.
- 870 HOWE, G. T., AITKEN, S. N., NEALE, D. B., JERMSTAD, K. D., WHEELER, N. C. & CHEN, T. H. 2003. From  
871 genotype to phenotype: unraveling the complexities of cold adaptation in forest trees.  
872 *Canadian Journal of Botany*, 81, 1247-1266.
- 873 HURME, P., REPO, T., SAVOLAINEN, O. & PÄÄKKÖNEN, T. 1997. Climatic adaptation of bud set and  
874 frost hardiness in Scots pine (*Pinus sylvestris*). *Canadian Journal of Forest Research*, 27, 716-  
875 723.
- 876 HURME, P., SILLANPÄÄ, M. J., ARJAS, E., REPO, T. & SAVOLAINEN, O. 2000. Genetic basis of climatic  
877 adaptation in Scots pine by Bayesian quantitative trait locus analysis. *Genetics*, 156, 1309-  
878 1322.
- 879 ISABEL, N., HOLLIDAY, J. A. & AITKEN, S. N. 2020. Forest genomics: Advancing climate adaptation,  
880 forest health, productivity, and conservation. *Evolutionary Applications*, 13, 3-10.
- 881 ISIK, F., BARTHOLOMÉ, J., FARJAT, A., CHANCEREL, E., RAFFIN, A., SANCHEZ, L., PLOMION, C. &  
882 BOUFFIER, L. 2016. Genomic selection in maritime pine. *Plant Science*, 242, 108-119.
- 883 JERMSTAD, K., BASSONI, D., JECH, K., WHEELER, N. & NEALE, D. 2001. Mapping of quantitative trait  
884 loci controlling adaptive traits in coastal Douglas-fir. I. Timing of vegetative bud flush.  
885 *Theoretical and Applied Genetics*, 102, 1142-1151.
- 886 JERMSTAD, K. D., BASSONI, D. L., JECH, K. S., RITCHIE, G. A., WHEELER, N. C. & NEALE, D. B. 2003.  
887 Mapping of quantitative trait loci controlling adaptive traits in coastal Douglas fir. III.  
888 Quantitative trait loci-by-environment interactions. *Genetics*, 165, 1489-1506.
- 889 KANNINEN, M. 2010. *Plantation forests: global perspectives*, London  
890 Washington, DC., Earthscan.
- 891 KÖRNER, C. 2006. Significance of temperature in plant life. *Plant growth and climate change*, 48-69.
- 892 KORTE, A. & FARLOW, A. 2013. The advantages and limitations of trait analysis with GWAS: a review.  
893 *Plant methods*, 9, 1-9.
- 894 KUMAR, S., CHAGNÉ, D., BINK, M. C., VOLZ, R. K., WHITWORTH, C. & CARLISLE, C. 2012. Genomic  
895 selection for fruit quality traits in apple (*Malus domestica* Borkh.). *PloS one*, 7, e36674.
- 896 LAUBE, J., SPARKS, T. H., ESTRELLA, N., HÖFLER, J., ANKERST, D. P. & MENZEL, A. 2014. Chilling  
897 outweighs photoperiod in preventing precocious spring development. *Global change biology*,  
898 20, 170-182.



- 899 LEWANDOWSKI, A., BORATYŃSKI, A. & MEJNARTOWICZ, L. 2000. Allozyme investigations on the  
900 genetic differentiation between closely related pines - *Pinus sylvestris*, *P. mugo*, *P. uncinata*,  
901 and *P. uliginosa* (Pinaceae). *Plant Systematics and Evolution*, 221, 15-24.
- 902 LIU, J.-J., SNIEZKO, R. A., STURROCK, R. N. & CHEN, H. 2014. Western white pine SNP discovery and  
903 high-throughput genotyping for breeding and conservation applications. *BMC plant biology*,  
904 14, 380.
- 905 MACKAY, T. F. 2001. The genetic architecture of quantitative traits. *Annual review of genetics*, 35,  
906 303-339.
- 907 MEUWISSEN, T., HAYES, B. & GODDARD, M. 2001. Prediction of total genetic value using genome-  
908 wide dense marker maps. *Genetics*, 157, 1819-1829.
- 909 MINAMIKAWA, M. F., NONAKA, K., KAMINUMA, E., KAJIYA-KANEGAE, H., ONOGI, A., GOTO, S.,  
910 YOSHIOKA, T., IMAI, A., HAMADA, H. & HAYASHI, T. 2017. Genome-wide association study  
911 and genomic prediction in citrus: potential of genomics-assisted breeding for fruit quality  
912 traits. *Scientific reports*, 7, 1-13.
- 913 MURANTY, H., TROGGIO, M., SADOK, I. B., AL RIFAĪ, M., AUWERKERKEN, A., BANCHI, E., VELASCO, R.,  
914 STEVANATO, P., VAN DE WEG, W. E. & DI GUARDO, M. 2015. Accuracy and responses of  
915 genomic selection on key traits in apple breeding. *Horticulture research*, 2, 1-12.
- 916 PARADIS, E. & SCHLIEP, K. 2019. ape 5.0: an environment for modern phylogenetics and evolutionary  
917 analyses in R. *Bioinformatics*, 35, 526-528.
- 918 PARCHMAN, T. L., GEIST, K. S., GRAHNEN, J. A., BENKMAN, C. W. & BUERKLE, C. A. 2010.  
919 Transcriptome sequencing in an ecologically important tree species: assembly, annotation,  
920 and marker discovery. *BMC genomics*, 11, 180.
- 921 PARK J-H., GAIL, M. H., WEINBERG, C. R., CARROLL, R. J., CHUNG, C., WANG, Z., CHANOCK, S. J.,  
922 FRAUMENI, J. F., CHATTERJEE, N. 2011. Distribution of allele frequencies and effect sizes and  
923 their interrelationships for common genetic susceptibility variants. *PNAS*, 108, 18026-18031
- 924 PERRY, A., WACHOWIAK, W., DOWNING, A., TALBOT, R. & CAVERS, S. 2020. Development of a single  
925 nucleotide polymorphism array for population genomic studies in four European pine  
926 species. *Molecular Ecology Resources*.
- 927 PLOMION, C., DUREL, C.-E. & O'MALLEY, D. 1996. Genetic dissection of height in maritime pine  
928 seedlings raised under accelerated growth conditions. *Theoretical and Applied Genetics*, 93,  
929 849-858.
- 930 PRUNIER, J., PELGAS, B., GAGNON, F., DESPONTS, M., ISABEL, N., BEAULIEU, J. & BOUSQUET, J. 2013.  
931 The genomic architecture and association genetics of adaptive characters using a candidate  
932 SNP approach in boreal black spruce. *BMC genomics*, 14, 368.
- 933 PRUNIER, J., VERTA, J. P. & MACKAY, J. J. 2016. Conifer genomics and adaptation: at the crossroads of  
934 genetic diversity and genome function. *New Phytologist*, 209, 44-62.
- 935 QUESADA, T., GOPAL, V., CUMBIE, W. P., ECKERT, A. J., WEGRZYN, J. L., NEALE, D. B., GOLDFARB, B.,  
936 HUBER, D. A., CASELLA, G. & DAVIS, J. M. 2010. Association mapping of quantitative disease  
937 resistance in a natural population of loblolly pine (*Pinus taeda* L.). *Genetics*, 186, 677-686.
- 938 R CORE TEAM 2020. R: A language and environment for statistical computing. R Foundation for  
939 Statistical Computing.
- 940 REPO, T., ZHANG, G., RYYPÖ, A., RIKALA, R. & VUORINEN, M. 2000. The relation between growth  
941 cessation and frost hardening in Scots pines of different origins. *Trees*, 14, 456-464.
- 942 RESENDE, M. D., RESENDE, M. F., SANSALONI, C. P., PETROLI, C. D., MISSIAGGIA, A. A., AGUIAR, A. M.,  
943 ABAD, J. M., TAKAHASHI, E. K., ROSADO, A. M. & FARIA, D. A. 2012a. Genomic selection for  
944 growth and wood quality in Eucalyptus: capturing the missing heritability and accelerating  
945 breeding for complex traits in forest trees. *New Phytologist*, 194, 116-128.
- 946 RESENDE, M. F., MUÑOZ, P., RESENDE, M. D., GARRICK, D. J., FERNANDO, R. L., DAVIS, J. M., JOKELA,  
947 E. J., MARTIN, T. A., PETER, G. F. & KIRST, M. 2012b. Accuracy of genomic selection methods  
948 in a standard data set of loblolly pine (*Pinus taeda* L.). *Genetics*, 190, 1503-1510.

- 949 SALMELA, M. J., CAVERS, S., COTTRELL, J. E., IASON, G. R. & ENNOS, R. A. 2011. Seasonal patterns of  
950 photochemical capacity and spring phenology reveal genetic differentiation among native  
951 Scots pine (*Pinus sylvestris* L.) populations in Scotland. *Forest Ecology and Management*, 262,  
952 1020-1029.
- 953 SCHLICHTING, C. D. 1986. The evolution of phenotypic plasticity in plants. *Annual Review of Ecology  
954 and Systematics*, 17, 667-693.
- 955 SEGURA, V., VILHJÁLMSOON, B. J., PLATT, A., KORTE, A., SEREN, Ü., LONG, Q. & NORDBORG, M. 2012.  
956 An efficient multi-locus mixed-model approach for genome-wide association studies in  
957 structured populations. *Nature genetics*, 44, 825.
- 958 STEVENS, K. A., WEGRZYN, J. L., ZIMIN, A., PUIU, D., CREPEAU, M., CARDENO, C., PAUL, R.,  
959 GONZALEZ-IBEAS, D., KORIABINE, M. & HOLTZ-MORRIS, A. E. 2016. Sequence of the sugar  
960 pine megagenome. *Genetics*, 204, 1613-1626.
- 961 STOCKS, J. J., METHERINGHAM, C. L., PLUMB, W. J., LEE, S. J., KELLY, L. J., NICHOLS, R. A. & BUGGS, R.  
962 J. 2019. Genomic basis of European ash tree resistance to ash dieback fungus. *Nature Ecology  
963 & Evolution*, 3, 1686-1696.
- 964 THISTLETHWAITE, F. R., RATCLIFFE, B., KLÁPŠTĚ, J., PORTH, I., CHEN, C., STOEHR, M. U. & EL-KASSABY,  
965 Y. A. 2017. Genomic prediction accuracies in space and time for height and wood density of  
966 Douglas-fir using exome capture as the genotyping platform. *BMC genomics*, 18, 1-16.
- 967 TRICK, M., LONG, Y., MENG, J. & BANCROFT, I. 2009. Single nucleotide polymorphism (SNP) discovery  
968 in the polyploid *Brassica napus* using Solexa transcriptome sequencing. *Plant biotechnology  
969 journal*, 7, 334-346.
- 970 WACHOWIAK, W., BALK, P. A. & SAVOLAINEN, O. 2009. Search for nucleotide diversity patterns of  
971 local adaptation in dehydrins and other cold-related candidate genes in Scots pine (*Pinus  
972 sylvestris* L.). *Tree Genetics & Genomes*, 5, 117.
- 973 WACHOWIAK, W., BORATYŃSKA, K. & CAVERS, S. 2013. Geographical patterns of nucleotide diversity  
974 and population differentiation in three closely related European pine species in the *Pinus  
975 mugo* complex. *Botanical Journal of the Linnean Society*, 172, 225-238.
- 976 WACHOWIAK, W., PALME, A. E. & SAVOLAINEN, O. 2011. Speciation history of three closely related  
977 pines *Pinus mugo* (T.), *P. uliginosa* (N.) and *P. sylvestris* (L.). *Molecular Ecology*, 20, 1729-  
978 1743.
- 979 WACHOWIAK, W., PERRY, A., DONNELLY, K. & CAVERS, S. 2018a. Early phenology and growth trait  
980 variation in closely related European pine species. *Ecology and evolution*, 8, 655-666.
- 981 WACHOWIAK, W., TRIVEDI, U., PERRY, A. & CAVERS, S. 2015. Comparative transcriptomics of a  
982 complex of four European pine species. *BMC genomics*, 16, 234.
- 983 WACHOWIAK, W., ZABOROWSKA, J., ŁABISZAK, B., PERRY, A., ZUCCA, G. M., GONZÁLEZ-MARTÍNEZ, S.  
984 C. & CAVERS, S. 2018b. Molecular signatures of divergence and selection in closely related  
985 pine taxa. *Tree genetics & genomes*, 14, 83.
- 986 WANG, M. & XU, S. 2019. Statistical power in genome-wide association studies and quantitative trait  
987 locus mapping. *Heredity*, 123, 287-306.
- 988 WESTBROOK, J. W., RESENDE JR, M. F., MUNOZ, P., WALKER, A. R., WEGRZYN, J. L., NELSON, C. D.,  
989 NEALE, D. B., KIRST, M., HUBER, D. A. & GEZAN, S. A. 2013. Association genetics of oleoresin  
990 flow in loblolly pine: discovering genes and predicting phenotype for improved resistance to  
991 bark beetles and bioenergy potential. *New Phytologist*, 199, 89-100.
- 992 WESTBROOK, J. W., ZHANG, Q., MANDAL, M. K., JENKINS, E. V., BARTH, L. E., JENKINS, J. W.,  
993 GRIMWOOD, J., SCHMUTZ, J. & HOLLIDAY, J. A. 2020. Optimizing genomic selection for blight  
994 resistance in American chestnut backcross populations: A trade-off with American chestnut  
995 ancestry implies resistance is polygenic. *Evolutionary applications*, 13, 31-47.
- 996 WUERTZ, D., SETZ, T. & CHALABI, Y. 2020. fBasics: Rmetrics - markets and basic statistics. R package  
997 version 3042.89.1 ed.

- 998 XIONG, J. S., MCKEAND, S. E., ISIK, F., WEGRZYN, J., NEALE, D. B., ZENG, Z.-B., E SILVA, L. D. C. &  
999 WHETTEN, R. W. 2016. Quantitative trait loci influencing forking defects in an outbred  
1000 pedigree of loblolly pine. *BMC genetics*, 17, 138.
- 1001 YANG, J., BENYAMIN, B., McEVOY, B. P., GORDON, S., HENDERS, A. K., NYHOLT, D. R., MADDEN, P. A.,  
1002 HEATH, A. C., MARTIN, N. H., MONTGOMERY, G. W., 2010. Common SNPs explain a large  
1003 proportion fo the heritability for human height. *Nature genetics*. 42, 565-569
- 1004 ZIMIN, A., STEVENS, K. A., CREPEAU, M. W., HOLTZ-MORRIS, A., KORIABINE, M., MARÇAIS, G., PUIU,  
1005 D., ROBERTS, M., WEGRZYN, J. L. & DE JONG, P. J. 2014. Sequencing and assembly of the 22-  
1006 Gb loblolly pine genome. *Genetics*, 196, 875-890.
- 1007 ZIMIN, A. V., STEVENS, K. A., CREPEAU, M. W., PUIU, D., WEGRZYN, J. L., YORKE, J. A., LANGLEY, C. H.,  
1008 NEALE, D. B. & SALZBERG, S. L. 2017. An improved assembly of the loblolly pine mega-  
1009 genome using long-read single-molecule sequencing. *Gigascience*, 6, giw016.

1010

1011 **Data accessibility**

1012 Phenotypes, sampling locations and SNPs will be uploaded to the EIDC (<https://eidc.ac.uk/>)

1013
